# Supplementary material
Source: publisher figshare collection journal article supplement (https://karger.figshare.com/ndownloader/files/31714589)
Supplement: Supplementary file 1 [file 31714589]

| Supplementary table 3: Effect modifications of AF on associations between brain MRI and atrial measurements | | | |
| --- | --- | --- | --- |
|  | Fazekas score  OR (95% CI) | Lacunar infarcts  OR (95% CI) |  |
| LAmax pr. 10 mL/m2 | 0.75 (0.22; 2.29) | 1.23 (0.59; 2.78) |  |
| LAmin pr. 10 mL/m2 | 0.47 (0.93; 2.20) | 1.65 (0.58; 5.48) |  |
| LATEF pr. 5% | 2.41 (0.84; 8.68) | 0.69 (0.29; 1.43) |  |
| LAPEF pr. 5% | 3.45 (1.35; 9.93)* | 1.10 (0.55; 2.28) |  |
| LAAEF pr. 5% | 1.60 (0.56; 4.96) | 0.57 (0.23; 1.21) |  |
| Caption: This table shows OR (95% CI) the effect modification link (LA variable*AF) in multivariable logistic regression models between Fazekas score (0 vs. ≥1) or lacunar infarcts (0 vs. ≥1) and indicated atrial findings in for all participants.  * p<0.05, **p<0.01  LAmax, left atrial maximum volume; LAmin, left atrial minimum volume; LATEF, left atrial total emptying fraction; LAPEF, left atrial passive emptying fraction; LAAEF, left atrial active emptying fraction | | | |
